# Supplementary material
Source: PubMed Central journal article supplement (PMC4968877)
Supplement: NIHMS805045-supplement-01.pdf [file NIHMS805045-supplement-01.pdf]

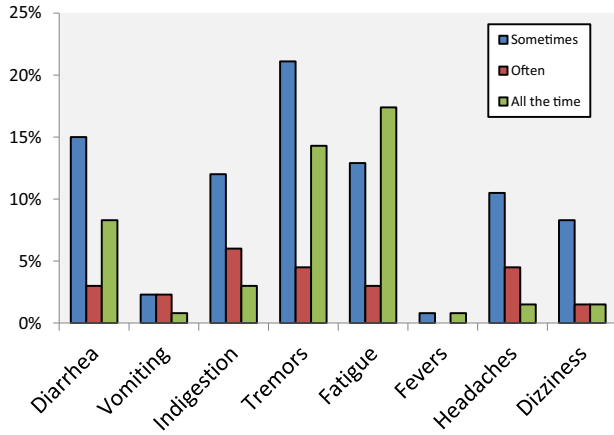

**Supplemental Figure 1.** Incidence of medication side effects in study population of kidney transplant recipients.

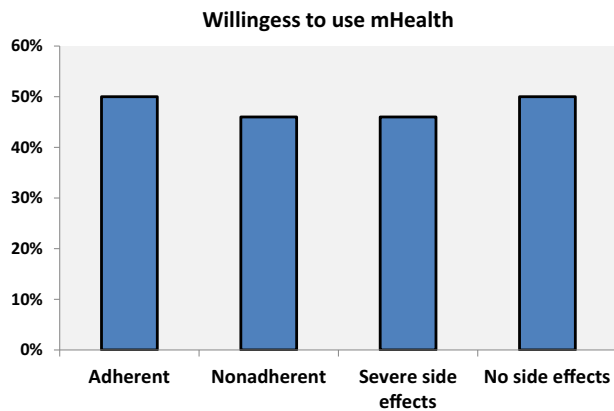

**Supplemental Figure 2.** Willingness to use mHealth technology according to medication adherence and experience of medication side effects.
